# Supplementary material
Source: PubMed Central journal article supplement (PMC4634643)

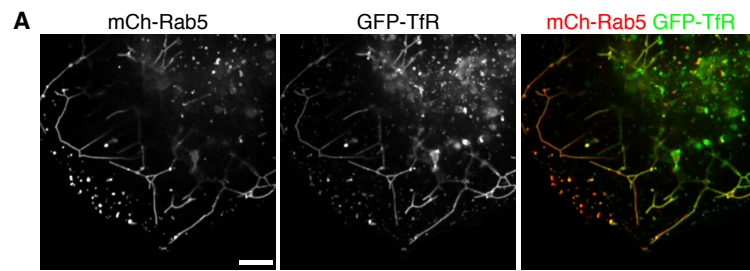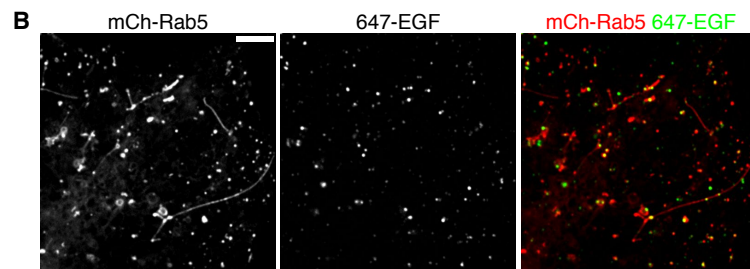

Supplement: NIHMS635977-supplement-1.pdf [file NIHMS635977-supplement-1.pdf]

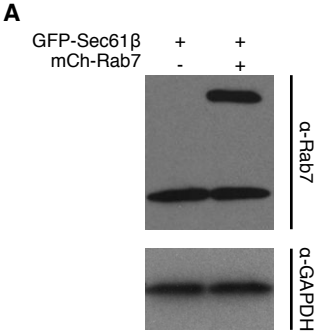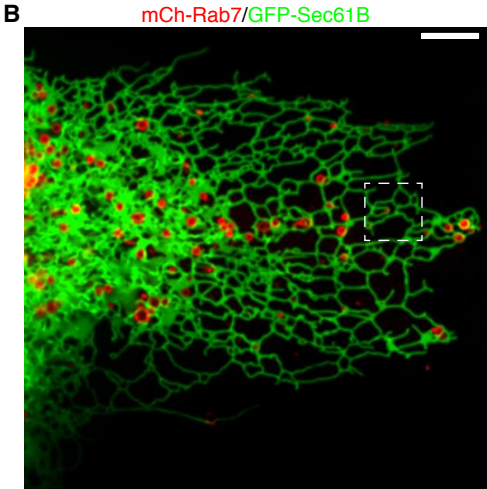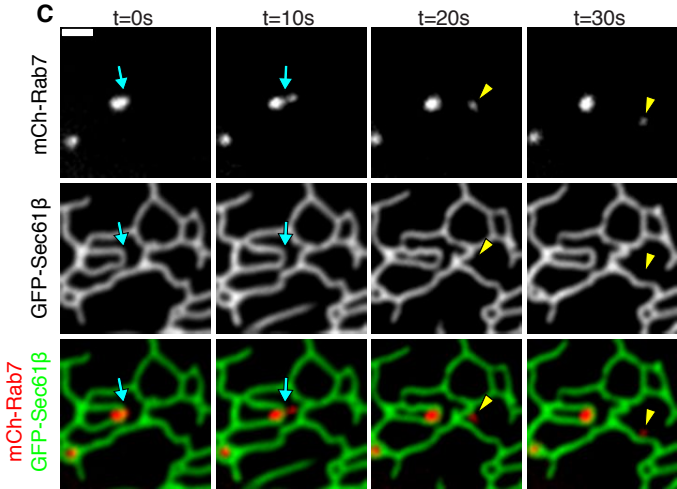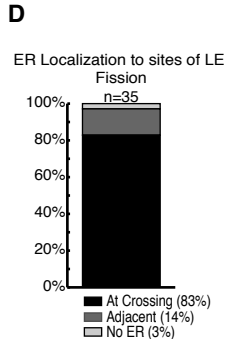

Supplement: NIHMS635977-supplement-2.pdf [file NIHMS635977-supplement-2.pdf]

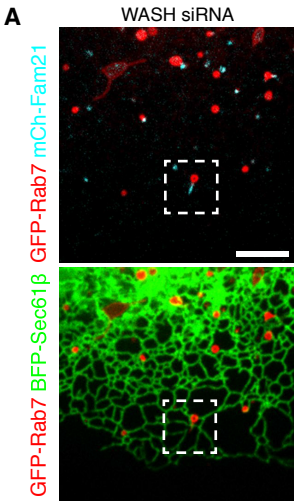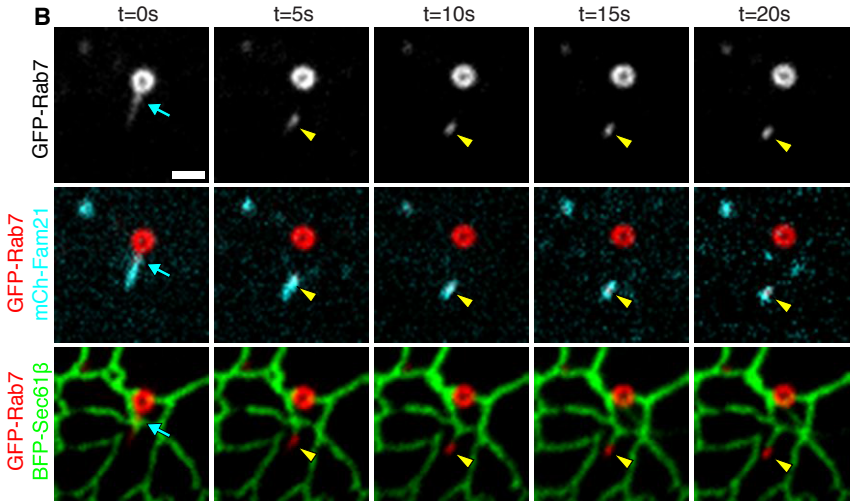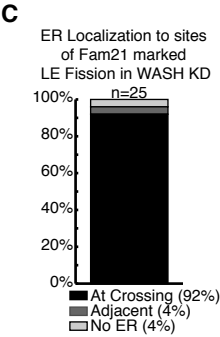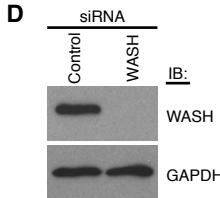

Supplement: NIHMS635977-supplement-3.pdf [file NIHMS635977-supplement-3.pdf]

**Supplemental Figure 4**

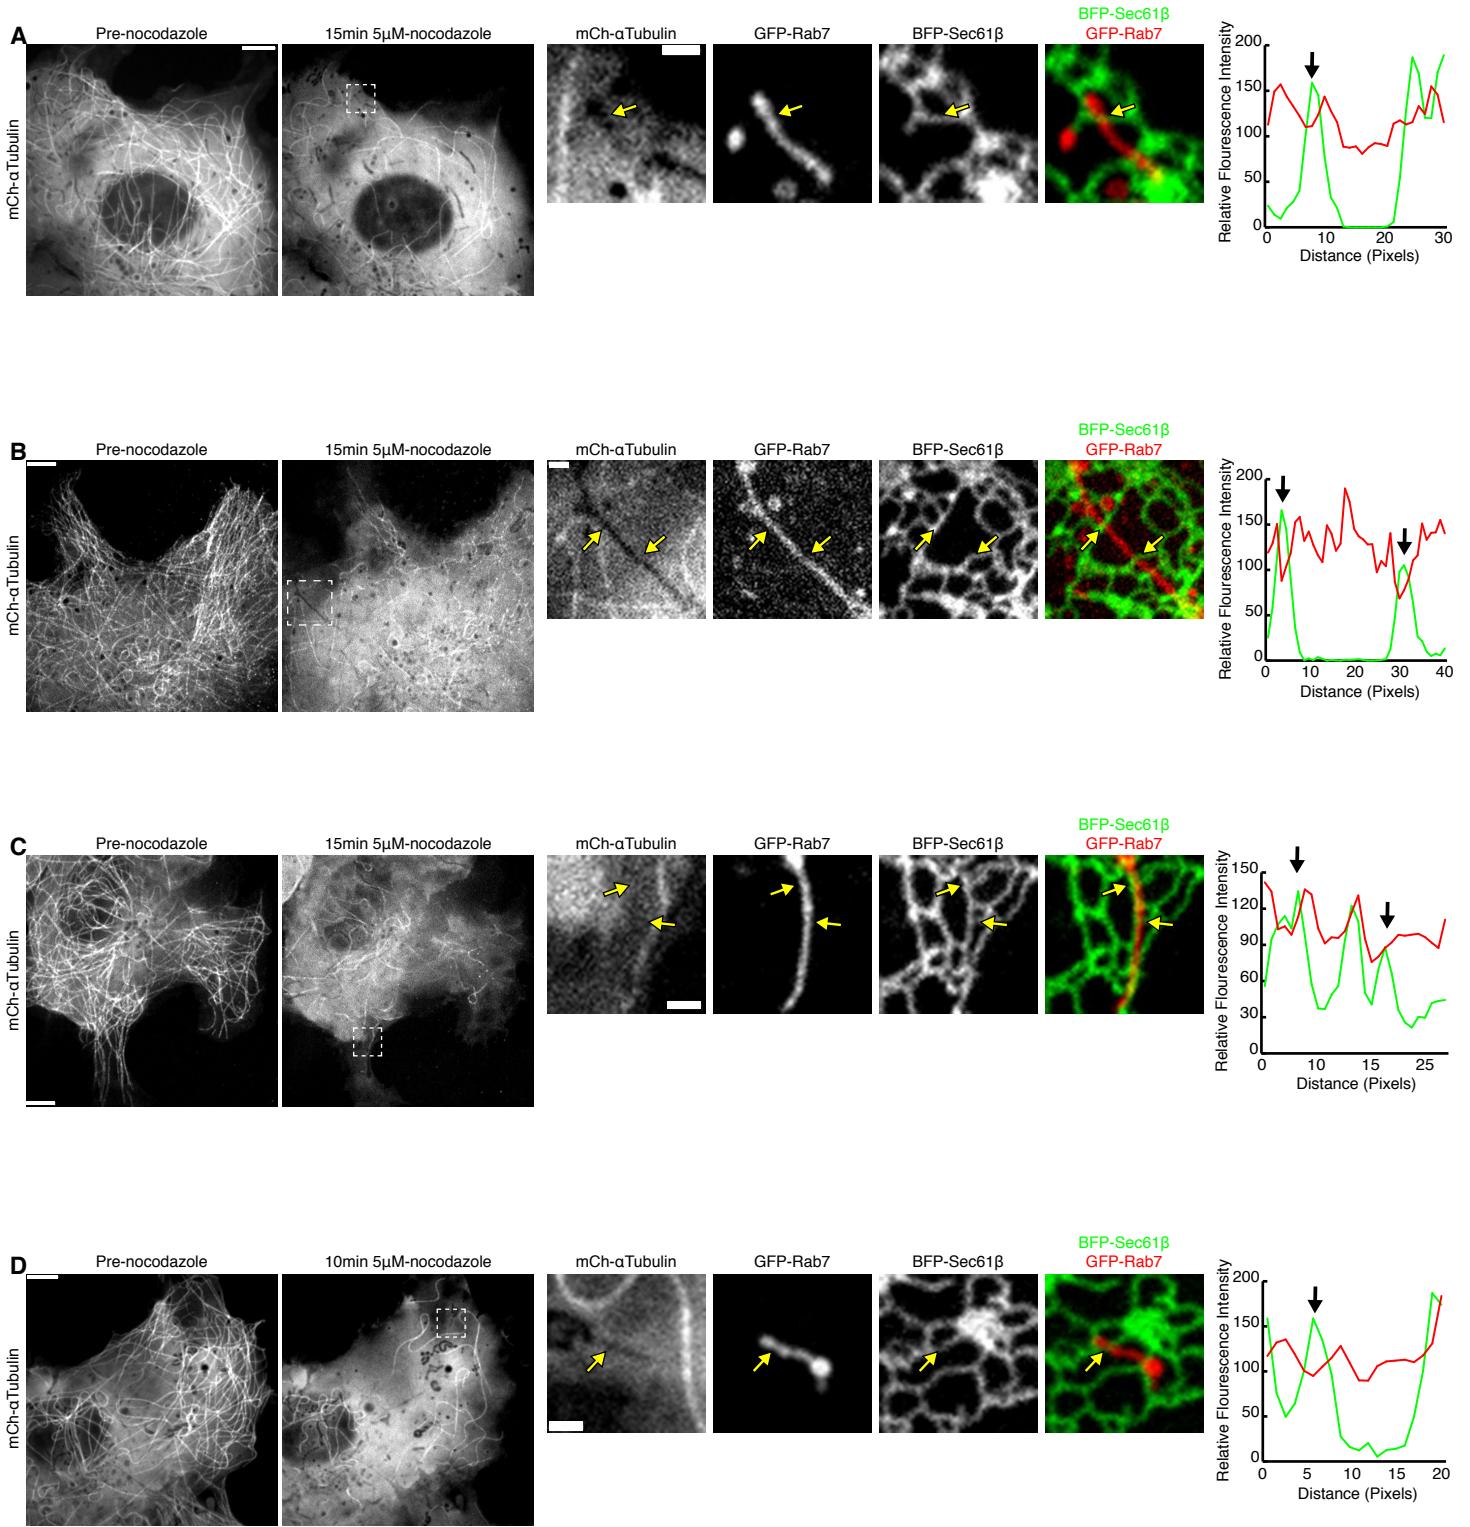

Supplement: NIHMS635977-supplement-4.pdf [file NIHMS635977-supplement-4.pdf]

Supplemental Figure 5

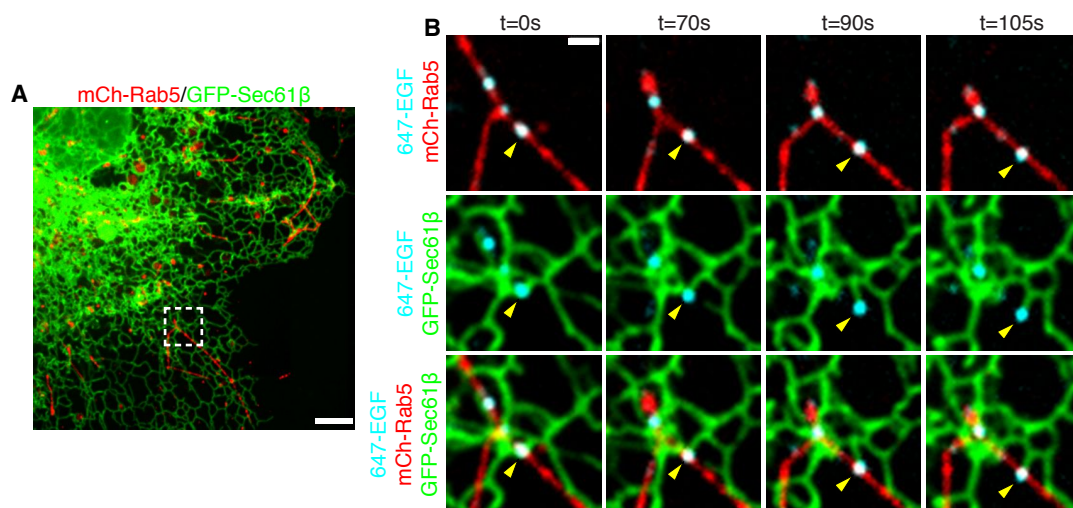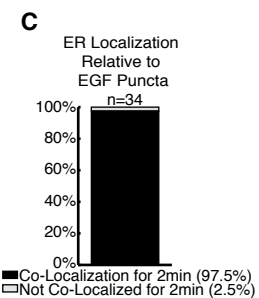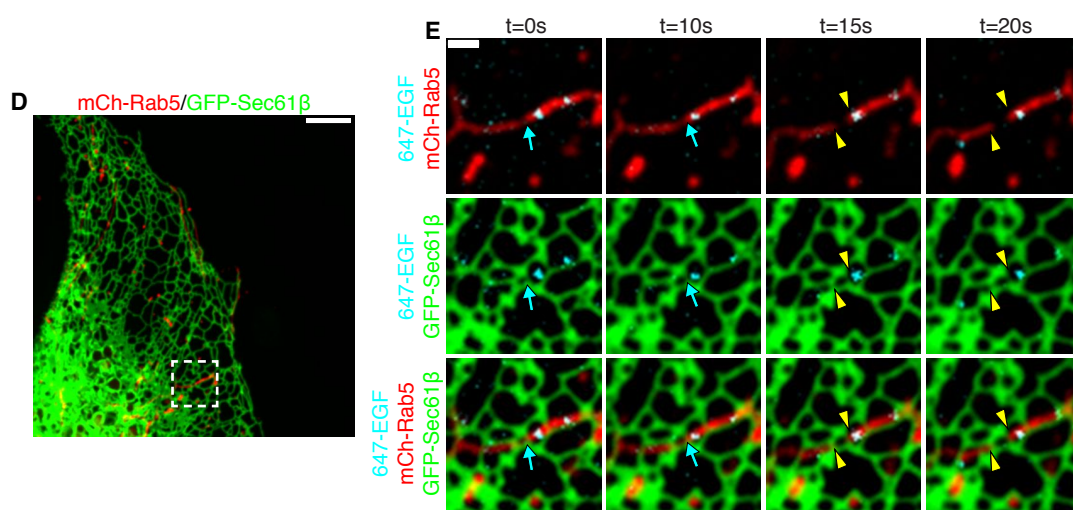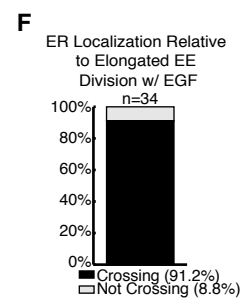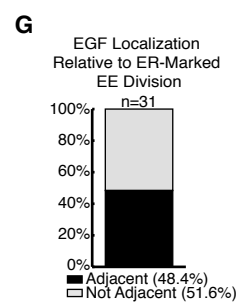

Supplement: NIHMS635977-supplement-5.pdf [file NIHMS635977-supplement-5.pdf]
